# Supplementary material
Source: HighWire-hosted journal article supplement (https://tobaccocontrol.bmj.com/highwire/filestream/164836/field_highwire_adjunct_files/2/tc-2021-057232supp003_data_supplement.pdf)
Supplement: tc-2021-057232supp003_data_supplement.pdf [file tc-2021-057232supp003_data_supplement.pdf]

**Supplementary File 3: Analysis of Tobacco Pack Size Distribution****Supplementary File 3 Table 1: Tobacco pack size distribution 2010-2020**

| Pack size within market partition | Percent of Pack Sizes (%) |      |      |      |      |      |      |      |      |      |      |
|-----------------------------------|---------------------------|------|------|------|------|------|------|------|------|------|------|
|                                   | 2010                      | 2011 | 2012 | 2013 | 2014 | 2015 | 2016 | 2017 | 2018 | 2019 | 2020 |
| <b>Super Value</b>                |                           |      |      |      |      |      |      |      |      |      |      |
| 20                                | 44.4                      | 47.6 | 60.0 | 63.6 | 75.0 | 70.6 | 70.6 | 55.0 | 34.4 | 73.1 | 63.6 |
| 25                                |                           |      |      |      |      | 5.9  | 5.9  | 30.0 | 28.1 | 26.9 | 36.4 |
| 30                                | 22.2                      | 19.0 | 20.0 | 18.2 | 6.3  | 5.9  | 5.9  | 5.0  | 12.5 |      |      |
| 40                                | 22.2                      | 33.3 | 20.0 | 18.2 | 18.8 | 17.6 | 17.6 | 10.0 | 25.0 |      |      |
| 60                                | 11.1                      |      |      |      |      |      |      |      |      |      |      |
| <b>Budget</b>                     |                           |      |      |      |      |      |      |      |      |      |      |
| 20                                | 34.3                      | 25.0 | 18.9 | 16.2 | 29.7 | 29.4 | 27.8 | 32.0 | 42.4 | 60.0 | 63.3 |
| 21                                | 8.6                       | 5.0  | 8.1  | 16.2 | 16.2 | 17.6 | 16.7 | 12.0 |      |      |      |
| 25                                | 20.0                      | 22.5 | 24.3 | 18.9 | 10.8 | 8.8  | 11.1 | 24.0 | 27.3 | 40.0 | 36.7 |
| 26                                |                           |      | 8.1  | 8.1  | 8.1  | 8.8  | 8.3  | 6.0  |      |      |      |
| 30                                | 28.6                      | 25.0 | 18.9 | 18.9 | 18.9 | 17.6 | 19.4 | 14.0 | 12.1 |      |      |
| 31                                | 8.6                       | 2.5  |      |      |      |      |      |      |      |      |      |
| 40                                |                           | 7.5  | 8.1  | 8.1  | 16.2 | 17.6 | 16.7 | 12.0 | 18.2 |      |      |
| 50                                |                           | 12.5 | 13.5 | 13.5 |      |      |      |      |      |      |      |
| <b>Everyday</b>                   |                           |      |      |      |      |      |      |      |      |      |      |
| 20                                | 41.0                      | 42.0 | 42.5 | 50.0 | 48.6 | 53.4 | 52.1 | 46.8 | 55.8 | 60.0 | 66.7 |
| 25                                | 20.5                      | 27.5 | 26.0 | 21.6 | 22.2 | 22.4 | 22.9 | 29.8 | 20.9 | 30.0 | 33.3 |
| 26                                | 3.8                       |      |      |      |      |      |      |      |      |      |      |
| 30                                | 20.5                      | 21.7 | 20.5 | 17.6 | 13.9 | 13.8 | 16.7 | 14.9 | 14.0 | 10.0 |      |
| 40                                | 5.1                       | 1.4  | 4.1  | 4.1  | 4.2  | 5.2  | 6.3  | 6.4  | 7.0  |      |      |
| 50                                | 5.1                       | 7.2  | 6.8  | 6.8  | 11.1 | 5.2  | 2.1  | 2.1  | 2.3  |      |      |
| 52                                | 3.8                       |      |      |      |      |      |      |      |      |      |      |
| <b>Premium</b>                    |                           |      |      |      |      |      |      |      |      |      |      |
| 20                                | 69.4                      | 73.9 | 77.3 | 73.7 | 69.0 | 69.0 | 57.1 | 57.1 | 57.1 | 70.0 | 68.4 |
| 25                                | 22.6                      | 21.7 | 22.7 | 26.3 | 24.1 | 24.1 | 33.3 | 33.3 | 35.7 | 30.0 | 31.6 |
| 30                                | 1.6                       | 2.2  |      |      |      |      |      |      |      |      |      |
| 40                                | 1.6                       | 2.2  |      |      |      |      |      |      |      |      |      |
| 50                                | 4.8                       |      |      |      | 6.9  | 6.9  | 9.5  | 9.5  | 7.1  |      |      |
